# Supplementary material for: Anaesthesia Professionals’ Perspectives on ECG Interpretation and Arrhythmia Situation Awareness with Visual Patient Heart: A Qualitative Multicentre Study
Source: Research Square preprint supplement (doi:10.21203/rs.3.rs-8661915/v1), 2026-01-29
Supplement: Supplementary file 1 [file 293db8475ebb762364b51e59.docx]

**Supplementary Material 2:**

# **Anaesthesia Professionals’ Perspectives on ECG Interpretation and Arrhythmia Situation Awareness with Visual Patient Heart: A Qualitative Multicentre Study**

**Semi-structured Interview Guide**

**Purpose of the interview**
The purpose of the interview is to explore anaesthesia professionals’ perceptions of the Visual Patient Heart technology, with a particular focus on perceived benefits, limitations, and areas for further improvement related to ECG interpretation and arrhythmia situation awareness.

**Interview format**
Semi-structured interviews are conducted. All participants are asked the same initial open-ended questions. Follow-up questions and prompts may be used to clarify responses or encourage elaboration.

**Core interview questions**

1. What advantages do you see in using Visual Patient Heart?
   - Possible prompts (if needed):
     - Perceived usefulness in routine clinical work or critical situations
     - Impact on situation awareness
     - Effects on ECG interpretation
2. Where do you see weaknesses or areas for improvement in the technology?
   - Possible prompts (if needed):
     - Suggestions for future development
     - Design, usability, or information content
     - Limitations in specific clinical scenarios

**Closing prompt**

- Is there anything else you would like to add regarding your experience or impressions of Visual Patient Heart?

**Note**
The interview guide is specifically developed for this study and has not been published previously.
