# Supplementary material for: Anaesthesia Professionals’ Perspectives on ECG Interpretation and Arrhythmia Situation Awareness with Visual Patient Heart: A Qualitative Multicentre Study
Source: Research Square preprint supplement (doi:10.21203/rs.3.rs-8661915/v1), 2026-01-29
Supplement: Supplementary file 2 [file 5907dccbd16f49595b993ea1.xlsx]

## Sheet: Question 1 (Advantages)
Final Category by Group	ID	Welche Vorteile sehen Sie in der Anwendung von Visual Patient Heart?	ChatGPT 4.o translated, human checked answers to the question: What advantages do you see in using Visual Heart?
Quick and Easy Learnability	59	Gute Idee, wenn ordentlich geschult	Good idea when properly trained
Potential Use Cases		Gut im Schockraum für wichtige paar Diagnosen	Useful in the emergency room for a few important diagnoses
Improved Awareness		Gibt eine Vorahnung und hilft Bewusstsein zu verbessern	Provides a preliminary impression and helps improve awareness
Understandability Across Experience Levels		Besonders für Pflegepersonal vorteilhaft	Especially advantageous for nursing staff
Reduced Workload	58	Leichter bestimmte Rhythmen zu erkennen	Easier to recognize certain rhythms
Time Savings		Schnellere Erkennung	Faster recognition
Reduced Workload		Weniger Stress in der kurzen Zeit	Less stress in a short amount of time
User-Friendliness	56	Intuitiv	Intuitive
Understandability Across Experience Levels		Gut, wenn man keine EKG Kenntnisse hat	Good for people with no ECG knowledge
Design Efficiency	55	Bilder sind einfacher zu merken	Images are easier to remember
Pacer		Schrittmacher ist gut	Pacemaker detection is good
ST Segment		ST war gut	ST was good
ST Segment	54	Einfach visualisiert, zB ST Strecken intuitiv und zuordenbar	Simple visualization, e.g., ST segments are intuitive and assignable
Understandability Across Experience Levels		Einfach auch der Pflege eine Idee zu geben, ob sie Info weiterleiten sollen	Simple to give nurses an idea of whether they should pass on information
Non-Specific Positivity		Erkennbar	Recognizable
Understandability Across Experience Levels		Gut für Ungeschulte	Good for the untrained
User-Friendliness	51	Angenehmer als EKG Interpretation	More pleasant than ECG interpretation
Non-Specific Positivity		Eindrücklicher	More impactful
Increased Decision Confidence	49	Gut die Pathologien erkannt	Pathologies were well-recognized
Time Savings		Schneller als EKG konventionell	Faster than conventional ECGs
Increased Decision Confidence		Erleichtert Blickdiagnose	Simplifies visual diagnosis
User-Friendliness	48	Intuitiv, ziemlich gut	Intuitive, quite good
Time Savings		Vorteil von VPH bezüglich Geschwindigkeit offensichtlich	Obvious advantage of VPH in terms of speed
ST Segment, Pacer		ST anterior, ST posterior und Schrittmacher einfach	ST anterior, ST posterior, and pacemaker detection are easy
Design Efficiency	47	Einfach strukturiert dargestellt	Presented in a simple structure
Quick and Easy Learnability		Leicht erklärt, teaching	Clearly explained, teaching-friendly
Design Efficiency		Gut nachvollziehbar	Easy to follow
Aesthetic Appeal	46	Verständliche Visualisierung (Farbe, Form, Geschwindigkeit)	Understandable visualization (color, shape, speed)
Non-Specific Positivity		Mega	Excellent
Non-Specific Positivity		Super	Superb
Reduced Workload		Erleichtert Blickdiagnose im Vergleich zum 12-Kanal EKG	- **"Facilitates visual diagnosis compared to a L-lead ECG"**
Aesthetic Appeal	45	Schöne Darstellung, intuitiv	- **"Beautiful presentation, intuitive"**
Design Efficiency	44	Übersichtlich	- **"Clear and well-organized"**
Time Savings		Schneller	- **"Faster"**
Reduced Workload		Leichter	- **"Easier"**
Time Savings		Sofortiger Überblick, man hat die Diagnose sofort	- **"Instant overview, you get the diagnosis immediately"**
User-Friendliness		Intuitiv, leicht zu lernen	- **"Intuitive, easy to learn"**
Aesthetic Appeal	43	Gut dargestellt	- **"Well presented"**
Design Efficiency		Einfach, nicht zu komplizierte Info	- **"Simple, not overly complicated information"**
Design Efficiency	42	Visualisierte Darstellung simpel zu verstehen	- **"Visualized representation is easy to understand"**
Time Savings		Schneller erkennbar	- **"Faster recognition"**
Quick and Easy Learnability		Gut lernbar	- **"Easy to learn"**
Design Efficiency		Nicht so viele Fokuspunkte	- **"Not too many focus points"**
Quick and Easy Learnability	41	Für visuelle Lerner super	- **"Great for visual learners"**
Improved Awareness		Einzelne Objekte gut erkennbar	- **"Individual elements are easy to recognize"**
Potential Use Cases		Aus Entfernung auch gut	- **"Clearly visible from a distance"**
Improved Awareness		Unterschiedliche Muster gut unterscheidbar	- **"Different patterns are easy to distinguish"**
User-Friendliness		Sehr anwenderfreundlich	- **"Very user-friendly"**
Understandability Across Experience Levels		Gut für neue Mitarbeiter und die, die nicht viel EKG-Kenntnisse haben	- **"Good for new employees and those with limited ECG knowledge"**
Improved Awareness	40	Visuell kann man den Rhythmus schneller erfassen	- **"Visually, rhythms are easier to grasp"**
User-Friendliness	39	Einfach zu merken	- **"Easy to remember"**
Improved Awareness		Schnell gesehen, vor allem bei komplexeren Pathologien	- **"Quickly noticed, especially with more complex pathologies"**
Time Savings	38	Diagnose ist schneller, unter der Voraussetzung das die Algorithmen stimmen	- **"Diagnosis is faster, assuming the algorithms are correct"**
Aesthetic Appeal	37	Sieht schöner aus	- **"Looks better"**
User-Friendliness		Easy zu merken	- **"Easy to remember"**
ST Segment		ST Darstellung gut	- **"ST representation is good"**
Atrial Visualizations		Sinus Rhythmus Knoten ist gut	- **"Sinus rhythm node is good"**
Ventricular Visualizations		Bigeminus Trigeminus Muster	- **"Bigeminy and trigeminy patterns"**
User-Friendliness	36	Intuitiv	- **"Intuitive"**
Time Savings		Schnell lernbar	- **"Quick to learn"**
Increased Decision Confidence		Schnellere Blickdiagnose, praktisch	- **"Faster visual diagnosis, practical"**
Design Efficiency	34	Auf einen Blick erkennbar, zB VHF oder Sinus	- **"Recognizable at a glance, e.g., Atrial fibrillation or sinus rhythm"**
ST Segment		ST hilft besonders, weil nicht einfach erkennbar	- **"ST helps especially because it is not easy to identify"**
Atrial Visualizations		P Welle ist gut	- **"P wave is good"**
Perceived Benefits	35	Greifbarer als abgeleitetes 12-Kanal EKG	- **"More tangible than a derived 12-lead ECG"**
Quick and Easy Learnability		Mit guter Schulung sitzt es eher als Hochkomplexes	- **"With good training, it is easier than something highly complex"**
Quick and Easy Learnability	33	Mit Training gut	- **"Good with training"**
Understandability Across Experience Levels		Besonderer Mehrwert Pflege	- **"Particularly valuable for nursing staff"**
Quick and Easy Learnability		Besonders gut für visuelle Lerntypen	- **"Especially beneficial for visual learners"**
Quick and Easy Learnability	32	Für visuelle Lehre vorteilhaft	Advantageous for visual teaching.
Understandability Across Experience Levels		Für Pflege überhaupt mal cool	- **"Really cool for nursing staff"**
Design Efficiency		Kompakt, komprimiert, schneller Überblick	- **"Compact, concise, quick overview"**
Time Savings	31	Wenn standardisiert, schnell und einfach zu erkennen	- **"If standardized, quick and easy to recognize"**
Non-Specific Positivity		Cool gemacht	- **"Nicely done"**
Atrial Visualizations	30	Vorhofaktion besser erkennbar, schnell auf einen Blick	- **"Atrial activity is better recognizable, quickly at a glance"**
Perceived Benefits		Als complimentary tool good	- **"Good as a complementary tool"**
Increased Decision Confidence	29	Manche Sachen werden eindeutig und schneller erkannt	- **"Some things are more obvious and recognized faster"**
Quick and Easy Learnability		Mit mehr Zeit/Training könnte man sich das gut einprägen	- **"With more time/training, it could be well memorized"**
Pacer		Schrittmacher ist einfach	- **"Pacemaker is easy to interpret"**
Time Savings	22	Kein Zeitdruck	- **"No time pressure"**
Design Efficiency		Sehr übersichtlich, muss keine 1000 Ableitungen angucken	- **"Very clear, no need to look at 1,000 leads"**
Pacer		Zusatz zB Pacemaker leads sind cool	- **"Extras like pacemaker leads are cool"**
Design Efficiency	23	Komplexer Inhalt auf Basics vereinfacht	- **"Complex content simplified to basics"**
Understandability Across Experience Levels		Wäre auch gut für Hausärzte und andere specializations	- **"Would also be good for general practitioners and other specializations"**
Improved Awareness	24	Schneller Überblick	- **"Faster overview"**
Perceived Benefits		Besser als nur eine Ableitung oder Stillbild 12 Kanal	- **"Better than just a single lead or a still image of a single-lead ECG"**
Feedback on Specific Visualizations		Pulsierung gut	- **"Pulsation is good"**
Time Savings	25	Zustand schneller erkennbar wenn Darstellung vertraut	- **"State becomes recognizable faster once you’re familiar with the visualization"**
ST Segment		ST Relevant	- **"ST segments are relevant"**
Increased Decision Confidence		Zielführend mit den klar unterschiedlichen Frequenzen	- **"Effective with clearly different frequencies"**
Improved Awareness		Schnellere Erkennung aus der Ferne ob OK oder nicht, praktisch zB beim Saalwechsel oder Ablenkung	- **"Faster recognition from a distance, practical e.g., during room changes or distractions"**
Understandability Across Experience Levels	26	Diagnosen direkt offensichtlich, auch für EKG-Unerfahrene	- **"Diagnoses are immediately obvious, even for those inexperienced with ECGs"**
Understandability Across Experience Levels	27	Erleichterung bei wenig Übung als A Pflege	- **"Helpful for those with little practice as a nursing assistant"**
ST Segment		ST Abweichung greifbarer wenn ungeübt	- **"ST deviations are easier to grasp for the inexperienced"**
Quick and Easy Learnability		Mit mehr Teaching hat es unglaubliches Potential im Vergleich zu Standard EKG Analysen	- **"With more teaching, it has incredible potential compared to standard ECG analyses"**
Time Savings	28	Schnell, easy	- **"Fast, easy"**
Understandability Across Experience Levels	65	Für Anfänger gut visualisiert	- **"Well visualized for beginners"**
Design Efficiency		Viele Dinge zusammengefasst	- **"Combines many things into one"**
User-Friendliness		Leicht zu verstehen	- **"Easy to understand"**
Potential Use Cases		In Notfallsituationen eingängig	- **"Intuitive in emergency situations"**
Quick and Easy Learnability		Braucht nicht unbedingt Einweisung	- **"Does not necessarily require an introduction"**
Understandability Across Experience Levels	64	Für Anfänger, weil es nochmal visualisiert von wo nach wo, wenn es rückwärts geht stimmt was nicht	- **"Good for beginners as it visualizes where it’s coming from and going to; if it’s backward, something is wrong"**
Pacer		Pacemaker gut, bei eindeutigen Phänomänen wie Vorhofflimmern, Ventrikuläre Tachykardie sehr eindeutig, da brauch ich keine Visualisierung	- **"Pacemaker is clear, and for obvious phenomena like Atrial Visualizations fibrillation or ventricular tachycardia, it’s very obvious—no visualization needed"**
Increased Decision Confidence		Beides ist gut, EKG und Visualisierung. Vorteile von beiden. Unsicherheit bestätigt oder nicht bestätigt.	- **"Both are good: ECG and visualization. Each has its advantages. Confirms or refutes uncertainties"**
Time Savings	63	Wesentlich schneller als EKG Auswertung	- **"Much faster than ECG interpretation"**
Increased Decision Confidence		Sicherer im Gefühl gefühlt	- **"Felt more confident with it"**
User-Friendliness		Die Animationen sind leicht verständlich	- **"Animations are easy to understand"**
Pacer		Herzschrittmacher war einfach	- **"Pacemaker was simple"**
ST Segment		Zum Beispiel ST-Segmente sind auch einfach zu erkennen	- **"ST segments are also easy to identify"**
Reduced Workload	62	Fand entspannter Darstellung auf Männchen als das EKG in der kurzen Zeit	- **"Found the representation on the avatar more relaxing than interpreting the ECG in a short time"**
Improved Awareness		Hat Vorteil, weil verschiedene Sachen auf Männchen schneller und mehr nebenbei erfasst (Salienz)	- **"Advantage because various things are captured faster and more intuitively on the avatar (salience)"**
Non-Specific Positivity		Findet es niedlich	- **"Find it cute"**
Non-Specific Positivity		Emotionale Bindung	- **"Emotional connection"**
Non-Specific Positivity		Man will, dass es dem Avatar gut geht auf dem Bildschirm	- **"You want the avatar on the screen to be okay"**
Design Efficiency	61	Einfach dargestellt	- **"Simple representation"**
Aesthetic Appeal		Die Figur, als Visuelles, hier die Rhythmen	- **"The figure as a visual element, especially the rhythms"**
Increased Decision Confidence		Bei den meisten sehr sicher gefühlt, schnell erfassen und umsetzen	- **"Felt very confident in most cases, quickly recognized and acted on"**
Design Efficiency		Die Simpelheit, es sind nur drei Teile auf die man achten muss	- **"The simplicity—there are only three parts to focus on"**
Time Savings		Es ist schneller klar wo es ist, ist es im Vorhof, im Ventrikel, …	- **"It’s immediately clear where it is—atrium, ventricle, etc."**
Perceived Benefits	75	Die Idee an und für sich	- **"The idea itself"**
Perceived Benefits		An der Studie merke ich selber, dass mehr Details dazu kommen, die das System besser machen, und das würde effektiv mehr helfen im Alltag	- **"During the study, I realized that adding more details makes the system better and would effectively help more in everyday use"**
Non-Specific Positivity		Habe in der Neuro keinen Benefit bemerkt, macht die Idee aber nicht schlecht	- **"Didn’t notice a benefit in neurology, but it doesn’t make the idea bad"**
Perceived Benefits		Herzrhythmen passen gut dazu	- **"Heart rhythms fit well with it"**
Perceived Benefits		Zunahme des klinischen Benefits durch Visual Patient Heart	- **"Increase in clinical benefit through Visual Patient Heart"**
Improved Awareness		Nimmt man Veränderungen einer Situation mit VP besser wahr als mit konventionellem EKG (Aufmerksamkeitsaspekt)	- **"Changes in a situation are perceived better with Visual Patient than with conventional ECG (attention aspect).**
Design Efficiency	71	Visualisierungen sind einfach zu merken und Rhythmen einfach zu erkennen	- **"Visualizations are easy to remember, and rhythms are easy to recognize"**
Increased Decision Confidence		Es reichen 3-4 Bildchen Training für sichere Diagnose vs. EKG benötigt viel mehr tägliches Training, Übung und Erfahrung	- **"3-4 images of training are enough for a confident diagnosis, compared to ECG which requires much more daily training, practice, and experience"**

## Sheet: Question 2 (Improvement Areas)
Final Category by Group	ID	Wo sehen Sie Schwächen oder Verbesserungspotenzial der Technologie?	ChatGPT 4.o translated, human checked answers to the question: "Where do you see weaknesses or areas for improvement in the technology?"
Improvement Suggestions	59	Weniger lange Liste an Pathologien	Shorter list of pathologies.
More Training Required	58	Teaching Phase verlängern, ausreichend darauf hinweisen	Extend the teaching phase and provide sufficient guidance.
Improvement Suggestions	54	Ungewohnt für Ärzte	Unfamiliar for doctors
Accuracy and Reliability of Algorithms		Stimmt es mit dem EKG tatsächlich überein	Does it actually match the ECG
More Training Required	51	gegen Ende schwierig gewesen mit nur dem Trainingsvideo	Towards the end, it was difficult with only the training video
Desire for Integration with Conventional ECG	48	Frequenz als Zahl	Frequency as a number
ST Segment		ST inferior vs. weitläufig schwierig differenzierbar	ST inferior vs. widespread is difficult to differentiate
ST Segment	47	ST verwirrend	ST is confusing
Atrial	45	P Welle/Bogen nicht verstanden	P wave/curve not understood
Ventricular	42	Bigeminus/Trigeminus schwieriger zu unterscheiden wegen Frequenz	Bigeminy/Trigeminy harder to distinguish due to frequency
ST Segment	41	ST-Abweichungen eindeutiger unterscheiden	ST deviations need to be more clearly differentiated
Ventricular		Bigeminus/Trigeminus mehr unterscheiden, mit Symbolik	Bigeminy/Trigeminy should be distinguished more, with symbols
More Training Required	40	Schulung müsste ausgeprägter sein	Training should be more comprehensive
ST Segment		ST-Lokalisationen muss man lernen	ST localizations need to be learned
Ventricular		Couplets und Ventrikuläre Rhythmen etwas uneindeutig	Couplets and ventricular rhythms are somewhat unclear
Asystole	39	Asystolie und Unbekannter Status verwechselt, bei Unbekannt vielleicht Pfeil weglassen	Asystole and unknown status confused, maybe omit arrow for unknown
Accuracy and Reliability of Algorithms	38	Vertrauen fehlt. Erkennt es Pathologien richtig?	Lack of trust. Does it recognize pathologies correctly
Improvement Suggestions	37	Herz weniger relevant als Pfeil	Heart less relevant than arrow
More Training Required		Braucht 1-2 Runden Training	Requires 1-2 rounds of training
Ventricular	36	Trigeminus/Bigeminus unsicher, aber auch im EKG	Trigeminy/Bigeminy uncertain, even in the ECG
Ventricular		Cognitive load mit ventrikulären Rhythmen	Cognitive load with ventricular rhythms
Ventricular	34	Ventrikuläre Pathologien schwieriger zu unterscheiden	Ventricular pathologies harder to differentiate
Ventricular		Zwei Pfeile für Trigeminus z.B.?	Two arrows for Trigeminy, for example
Desire for Integration with Conventional ECG	35	EKG fehlt im Hintergrund	ECG missing in the background
Improvement Suggestions	33	Wäre einfacher, wenn weniger Visualisierungen/ Diagnosen auf die wesentlichen reduziert wären	Would be easier if fewer visualizations/diagnoses were reduced to the essentials
More Training Required	32	Training via Trainingsvideo müsste mehrmalig anstatt einmalig erfolgen	Training via training video should occur multiple times instead of just once
Asystole	30	Gelber Punkt bei Asystole irreführend, sieht aus wie Block	Yellow dot for asystole is misleading, looks like a block
Feedback on Specific Visualizations	29	Manche Muster sind zu ähnlich, um sie auseinander zu halten (ST inferior vs. weitläufig, Asystolie vs. Unbekannter Status)	Some patterns are too similar to differentiate (ST inferior vs. widespread, asystole vs. unknown status)
Ventricular	22	Ventrikuläre Tachykardien etwas schwierig auseinanderzuhalten, man muss mitzählen	Ventricular tachycardias are somewhat difficult to distinguish, counting is necessary
Ventricular		Vielleicht anderes Item beifügen, um Ventriuläre Tachykardien zu unterscheiden	Perhaps add another item to differentiate ventricular tachycardias
Atrial		Sinusknoten rot machen (mehr bemerkbar)	Make sinus node red (more noticeable)
Fear of Declining ECG Skills	23	Angst, dass Infos verloren gehen	Fear of losing information
Fear of Declining ECG Skills		Ausbildung könnte untergehen, wenn man EKG-Auswertung nicht praktisch lernt	Training could suffer if ECG interpretation is not practiced hands-on
More Training Required	24	Braucht Schulung	Requires training
Desire for Manufacturer-Neutral		Firmenabhängig: Philips „Diagnosen“ nicht intuitiv (zB Missed Beat)	Manufacturer-dependent: Philips "diagnoses" not intuitive (e.g., missed beat)
Feedback on Specific Visualizations		Wofür der Aortabogen?	What is the purpose of the aortic arch
ST Segment		ST-Abweichungslokation nicht nötig, ausser in der Kardioanästhesie	ST deviation location not necessary, except in cardiac anesthesia
Ventricular	25	Ventrikuläre Unterschiede nicht ganz eindeutig, könnte noch eine Hiilfe brauchen	Ventricular differences are not entirely clear, could still need some help
Ventricular		VES Couplet und Bigenimus schwierig zu unterscheiden	VES couplet and bigeminy difficult to differentiate
ST Segment	26	ST-Visualisierung Lokalisierungen nicht ganz eindeutig	ST visualization localizations not entirely clear
More Training Required	27	Teaching ist wichtig	Teaching is important
Improvement Suggestions	28	Signal quality index fehlt?	Signal quality index missing
Desire for Integration with Conventional ECG	65	VPH nicht alleine, sondern EKG u. VPA beide kombiniert	VPH not alone, but ECG and VPA combined
Desire for Integration with Conventional ECG		Höhere Genauigkeit mit EKG: kann am EKG mehr sehen, in welcher Ableitung das Problem liegt	Higher accuracy with ECG: can see more on the ECG, in which lead the problem lies
Trust & Reliability		Man gibt die Verantwortung ab, weil es schon ausgewertet ist, durch was? KI, Philips Algorithmus?	Delegating responsibility because it is already evaluated, by what? AI, Philips algorithm
More Training Required		Ohne Einweisung bekommt man nur ein Gefühl und muss es schon irgendwie lernen oder es schriftlich daneben haben	Without instructions, you only get a feeling and have to somehow learn it or have it written down beside it
Pacer	64	Schrittmacher-Visualisierungen: Nicht unterscheidbar was ist "funktioniert", was ist "defekt"	Pacemaker visualizations: unclear what is "working" and what is "defective"
Study-Specific Feedback		Wäre einfacher, wenn man es länger sehen würde (in der Studie)	Would be easier if it could be seen for longer (in the study)
Desire for Manufacturer-Neutral		Begrifflichkeiten: Missed beat, VES Couplet. Was ist das?	Terminology: missed beat, VES couplet. What is that
Feedback on Specific Visualizations	63	Nicht alle Animationen sind schnell zu erkennen	Not all animations are quickly recognizable
Feedback on Specific Visualizations		Tachykardien Veränderungen werden schwierig	Tachycardia changes become difficult
Study-Specific Feedback	62	Es war sehr kurz. Ermöglicht nicht systematisches Auswerten	It was very short. Does not allow systematic evaluation
Trust & Reliability		Auto-EKG Auswertungen sind oft falsch	Auto-ECG evaluations are often wrong
Desire for Integration with Conventional ECG		Es muss sinnvoll sein die Primärdatenquelle auch anzuzeigen, nicht den Avatar alleine	It should make sense to display the primary data source as well, not just the avatar alone
Trust & Reliability		Wenig Bindung zu Daten sonst, man verliert Patienten aus dem Blick	Little connection to data otherwise, you lose the patient from view
Trust & Reliability		Man verlässt sich auf das Männchen, damit auch den Patienten	Reliance on the avatar means reliance on the patient
Improvement Suggestions		Patient hat wenig Persönlichkeit	Patient has little personality
Asystole		Asystolie ist optisch zu wenig schlimm, z.B. im Vergleich mit Vorhofflimmern	Asystole visually not severe enough, e.g., compared to atrial fibrillation
Feedback on Specific Visualizations		Vorhofflimmern ist generell zu auffällig, wenn es die ganze Zeit wäre, recht intensive Visualisierung für wenig Info/ Gefahr	Atrial fibrillation is generally too prominent if it were all the time, quite intensive visualization for little information/risk
Improvement Suggestions	61	Man sieht nur das Herz im Visual Patient Heart. Es muss gewährleistet sein eine Änderung deutlich hervorzuheben, z.B. durch Reinzoomen	You only see the heart in Visual Patient Heart. It must be ensured that a change is clearly highlighted, e.g., by zooming in
Pacer	75	Schrittmacher-Kabel könnte in den Pfeil hineingehen. Funktionierender / nicht-funktionierender Schrittmacher optisch unterschiedlicher machen, z.B. durch eine Schere	Pacemaker cable could go into the arrow. Functional/non-functional pacemaker visually different, e.g., with scissors
Study-Specific Feedback		Zeitproblem bei Studie, Unsicherheit wegen kurzer Zeit. Wenn mehr Zeit, mehr Zeit zur Interpretation und Entscheidung	Time issue in the study, uncertainty due to short duration. More time would mean more time for interpretation and decision-making
Feedback on Specific Visualizations		Missed beat: ggf. hat man einmal fehlenden Pfeil nicht gesehen, aber auf 20s EKG Monitor sieht man Missed beat auch noch Sekunden danach	Missed beat: possibly missed the arrow once, but on a 20s ECG monitor you still see the missed beat seconds later
Lack of perceived value		Durch langjährige Erfahrung mit EKG kein signifikanter Benefit von Visualisierung: "Ist für mich gleich"	No significant benefit of visualization with years of ECG experience: "For me, it’s the same"
Accuracy and Reliability of Algorithms	71	Vertrauen notwendig, dass Software richtigen Rhythmus erkennt, interpretiert u. visualisiert. Analyse muss richtig sein!	Trust necessary that software recognizes, interprets, and visualizes the correct rhythm. Analysis must be correct
ST Segment		Visualisierung des ischämischen Areals bei anterior vs. posterior ST-Hebung nicht intuitiv, in 2D Visualisierung anteriore rechts, posteriore links ist, muss man sich merken	Visualization of the ischemic area in anterior vs. posterior ST elevation not intuitive, in 2D visualization anterior is on the right, posterior on the left, you have to remember it
